# Supplementary material for: Socio-economic factors linked with mental health during the recession: a multilevel analysis
Source: Int J Equity Health. 2017 Mar 6;16:45. doi: 10.1186/s12939-017-0518-x (PMC5339976; doi:10.1186/s12939-017-0518-x)
Supplement: Additional file 1: — Contextual Indicators. (XLSX 12.9 kb) [file 12939_2017_518_MOESM1_ESM.xlsx]

## Sheet: Sheet1
Region	Healthcare spending per capita (euros)		Risk of poverty (%)		Income per capita per household (ratio to the Spain average x100)		GDP per capita (ratio to the Spain average x100)		Employment rate (per 100 person-year)		Unemployment rate (per 100 person-year)		Percentage of temporary workers (%)
	2006	2012	2006	2012	2006	2012	2006	2012	2006	2012	2006	2012	2006	2012
Andalucía	1045.58	1120.86	30.5	31	80.5845	80.1161	76.5201	75.0931	48.3	38.64	12.68	34.59	46.2	32.7
Aragón	1243.97	1523.24	13.5	19.5	110.261	111.813	107.222	111.278	53.45	48.31	5.54	18.58	28.6	21.4
Asturias	1243.49	1591.04	13	16.9	102.676	104.936	90.4858	93.5893	45.21	40.86	9.31	21.76	31.1	23
Baleares	1076.41	1143.9	13.1	24.2	109.366	100.367	109.863	105.823	59.97	51.18	6.46	23.17	33.2	24.1
Canarias	1161.29	1284.19	29.4	33.2	87.6972	83.6046	89.2008	84.9446	53.9	42.32	11.68	33	39.1	28.2
Cantabria	1348.65	1293.31	11.8	14.9	105.113	100.961	98.8493	97.3128	51.69	46.58	6.56	17.73	31.1	19.7
Castilla y León	1254.14	1302.32	24.6	17.3	103.085	102.355	95.1242	98.6676	48.78	44.45	8.11	19.74	29.6	20.3
Castilla-La Mancha	1218.74	1449.91	28.3	33.1	81.7817	83.8447	77.7121	79.3504	50.19	41.85	8.81	28.47	35.5	23
Cataluña	1131.18	1342.27	13.4	16.8	112.859	114.374	117.981	118.487	58.07	48.07	6.6	22.65	26.4	18.4
Comunidad Valenciana	1065.08	1312.68	19.6	23.8	90.7254	88.9408	91.6812	87.3895	54.63	43.25	8.37	27.65	36.6	27.1
Extremadura	1241.57	1525.97	37.5	34.1	78.2606	76.7609	67.8576	67.8704	44.65	37.05	13.43	33.04	42.8	34.3
Galicia	1167.47	1272.13	21.5	16.8	90.5986	94.9373	82.9058	91.2027	49.07	43.95	8.48	20.66	34.9	23.1
Madrid	1022.02	1297.15	11.9	15	120.697	119.991	130.723	129.676	59.51	51.98	6.37	18.99	29.3	17.6
Murcia	1143.18	1541.09	27.4	29.9	80.507	81.3634	83.6042	80.8712	54.35	44.86	7.85	27.88	42.1	32.6
Navarra	1251.61	1538.06	10.5	8.1	126.007	127.848	125.48	127.814	57.45	50.37	5.3	16.21	30.2	21.7
País Vasco	1266.59	1632.41	10.4	12.6	129.697	133.791	128.543	134.776	54.02	48.8	6.97	14.87	28.5	21
La Rioja	1487.95	1428.17	22.5	18.8	108.458	108.738	107.056	112.983	55.8	46.81	6.18	20.48	28.5	20.7
Spain average	1198.17	1388.16	19.9353	21.5294	100	100	100	100	52.8847	45.2547	8.15882	23.4982	33.7471	24.0529
Standard deviaton	117.369	153.533	8.49978	8.07169	16.4445	17.1723	19.1252	20.1444	4.65011	4.31295	2.42451	6.15427	5.84916	5.13689
